1 ERK5 kinase activity is not required for cellular immune  
2 response

3

4 **Emme C.K. Lin<sup>1\*</sup>, Christopher M. Amantea<sup>1</sup>, Tyzoon K. Nomanbhoy<sup>1</sup>, Helge Weissig<sup>1</sup>,**  
5 **Junichi Ishiyama<sup>2</sup>, Yi Hu<sup>1</sup>, Shyama Sidique<sup>1</sup>, Bei Li<sup>1</sup>, John W. Kozarich<sup>1</sup>, Jonathan S.**  
6 **Rosenblum<sup>1</sup>**

7

8 <sup>1</sup>ActivX Biosciences, Inc., La Jolla, CA, United States of America

9 <sup>2</sup>Watarase Research Center, Kyorin Pharmaceutical Co., Ltd., Nogi, Nogi-machi, Shimotsuga-  
10 gun, Tochigi, Japan

11

## 12 **Abstract**

13 Extracellular signal-regulated protein kinase 5 (ERK5) has been associated with several  
14 pathological states including cancer, cardiac hypertrophy, and inflammation. Unlike other  
15 members of the MAPK family, ERK5 contains a large C-terminal domain with transcriptional  
16 activation capability. Pharmacological inhibition of ERK5 with XMD8-92, a first generation  
17 ERK5 inhibitor, is efficacious in various oncology and inflammation models. Here we report the  
18 synthesis and characterization of potent and selective ERK5 inhibitors. Most of these  
19 compounds displayed good efficacy in cellular inflammation assays; intriguingly, other  
20 compounds lacked efficacy despite potently inhibiting ERK5 *in vivo*. The source of XMD8-92  
21 and related compounds' efficacy is now demonstrated to be from direct inhibition of  
22 bromodomains (BRDs), conserved protein modules involved in recognition of acetyl-lysine  
23 residues during transcriptional processes. We found no cellular effect from pure ERK5  
24 inhibitors and conclude that ERK5 kinase activity is not required for the immune response. The  
25 role of ERK5 in inflammation and oncology should be reinvestigated.

## 26 **Introduction**

27 Extracellular signal-regulated kinase 5 (ERK5) is a member of the mitogen-activated protein  
28 kinase (MAPK) family, which includes ERK1/2, JNK1/2/3, and p38 $\alpha$ / $\beta$ / $\delta$ / $\gamma$ <sup>1</sup>. Originally named  
29 big mitogen activated protein kinase 1 (BMK1) due to its uniquely large, 400 amino acid C-  
30 terminal domain, ERK5 can be phosphorylated as a result of cellular exposure to a broad range  
31 of mitogenic stimuli (e.g., growth factors, GPCR agonists, cytokines) and cellular stresses (e.g.,  
32 hypoxia, shear stress)<sup>2</sup>. Through the MAPK signaling cascade, ERK5 can undergo dual  
33 phosphorylation by MEK5 at the TEY motif in its N-terminal activation loop, resulting in  
34 conformation change and unlocking full kinase activity<sup>3</sup>. ERK5 can auto-phosphorylate  
35 multiple sites in its C-terminal half, which can then regulate nuclear shuttling and gene  
36 transcription<sup>4,5</sup>. Non-canonical kinase pathways (including cyclin dependent kinases during  
37 mitosis and ERK1/2 during growth factor stimulation) also exist for phosphorylation of  
38 overlapping sites in the ERK5 tail<sup>6-8</sup>. While ERK5 has been demonstrated to directly  
39 phosphorylate several transcription factors<sup>9-11</sup>, the non-kinase C-terminal tail of ERK5 can also  
40 interact with transcription factors and influence gene expression via its transcriptional activation  
41 domain<sup>5,12,13</sup>.

42 ERK5 deletion is embryonic lethal in mice and a variety of tissue or development-stage  
43 restricted deletions have shown clear, yet diverse phenotypes, suggesting that the kinase function  
44 and/or an aspect of the non-kinase domain(s) have key roles in development<sup>14-18</sup>. The recent  
45 description of the first ERK5 inhibitor XMD8-92 allowed for selectively studying the role of  
46 ERK5 kinase activity<sup>19,20</sup>. Effects of this inhibitor on cell proliferation were shown to be  
47 comparable to overexpression of a dominant negative ERK5 mutant<sup>20,21</sup> or to siRNA-mediated  
48 ERK5 knockdown<sup>21,22</sup>. Following a recent report on the role of ERK5 in TLR2-mediated

49 inflammation<sup>23</sup>, we set out to develop additional potent and selective ERK5 inhibitors as anti-  
50 inflammatory agents. Analysis of these new inhibitors, and further characterization of first  
51 generation ERK5 inhibitors, shows that ERK5 kinase activity is dispensable for immunity.

52

53 **Results**

54 **Inhibitors of ERK5**

55 Our interest in the pharmacological regulation of ERK5 in inflammation led to the development  
56 of a number of novel ERK5 kinase inhibitors derived from the benzopyrimidodiazepinone core  
57 of XMD8-92 (**Fig. 1**). The ATP-competitive inhibitors were shown to potently inhibit ERK5  
58 with  $IC_{50}$  values ranging from 8 to 190 nM using our chemoproteomics platform KiNativ, which  
59 profiles global kinase inhibition in native cellular lysates<sup>24,25</sup>. Using a 1  $\mu$ M screening  
60 concentration, we did not observe significant inhibition of off-target kinase activities among the  
61 greater than 100 kinases profiled in a single cellular lysate (Supplementary Results,  
62 **Supplementary Data Set 1**).

63

64 **Figure 1. Compound structures and potencies against ERK5 in cell lysate and in live cells**  
 65 **treated with compound.**

| Compound               | Structure                                                                           | Lysate ERK5 IC <sub>50</sub> (nM) | Intracellular ERK5 IC <sub>50</sub> (nM) |
|------------------------|-------------------------------------------------------------------------------------|-----------------------------------|------------------------------------------|
| AX15836 ( <b>A10</b> ) | 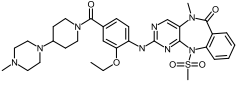   | 8                                 | 9                                        |
| AX15839 ( <b>B8</b> )  |    | 170                               | 430                                      |
| AX15892 ( <b>C7</b> )  |  | 30                                | 110                                      |
| AX15910 ( <b>B11</b> ) |  | 20                                | 17                                       |
| XMD8-92                |  | 190                               | 130                                      |

66

67

68           The ERK5 inhibitors were also evaluated in an additional KiNativ experiment (“live cell  
69   KiNativ”) wherein compound is incubated with live cells prior to washing, lysis and analysis.  
70   Such experiments provide an indication of the cellular permeability of the compound and of  
71   intracellular target- (and off target-) engagement. As seen in **Fig. 1**, intracellular ERK5 IC<sub>50</sub>  
72   values were very similar to lysate ERK5 IC<sub>50</sub> values, thus demonstrating that the compounds  
73   effectively reached their intracellular target.

74           The compounds were next tested for their ability to inhibit EGF-mediated  
75   autophosphorylation of ERK5 in HeLa cells<sup>5</sup>. In this classical band shift assay, growth factor  
76   stimulation results in the appearance of a slower migrating, autophosphorylated ERK5 form<sup>26</sup>.  
77   As seen in **Fig. 2**, when treated at 2 μM, a concentration of at least 10-fold over the weakest  
78   ERK5 IC<sub>50</sub>, all of the ERK5 inhibitors substantially blocked the mobility-retarded  
79   phosphorylated ERK5 band as expected. This phospho-ERK5 data together with the live cell  
80   KiNativ results indicated that we had potent, selective ERK5 inhibitors that were able to  
81   effectively engage their intracellular target.

82

83 **Figure 2. HeLa cell autophosphorylation assay.**

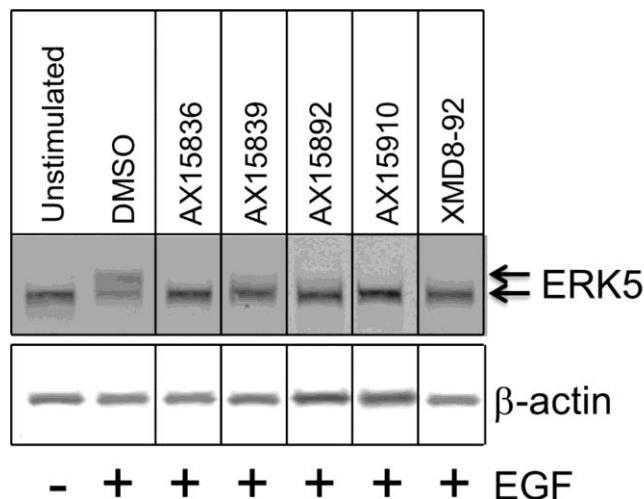

84

85 Stimulation of HeLa cells with EGF induced a slower migrating, autophosphorylated ERK5 band

86 (upper arrow) whose appearance was prevented by pharmacological ERK5 inhibition.

87 Compounds were screened at 2  $\mu$ M. Figure is a composite of lanes from nonadjacent samples.

88

89 **Characterization of inhibitors in inflammatory cell models**

90 We next assessed the ERK5 compounds in a cellular assay of inflammatory response. To

91 function in the recruitment of neutrophils and monocytes, the endothelial cell adhesion molecule

92 E-selectin is rapidly synthesized in response to inflammatory stimulation<sup>27</sup>. Primary human

93 umbilical vein endothelial cells (HUVEC) were incubated with compounds prior to stimulation

94 with the toll-like receptor (TLR1/2) agonist Pam<sub>3</sub>CSK<sub>4</sub>, a synthetic mimic of the acylated amino

95 terminus of bacterial triacylated lipopeptides. Up-regulation of cell-surface E-selectin was

96 quantified by flow cytometry (**Table 1**). Similar to that reported by Wilhelmsen and

97 colleagues<sup>23</sup>, we found the ERK5 inhibitor XMD8-92 to inhibit up to 38% of the E-selectin

98 expression. Likewise, two other ERK5 inhibitors AX15839 and AX15910 were effective in

99 reducing E-selectin. Surprisingly, two of the more potent ERK5 inhibitors (AX15836 and



100 AX15892) were inactive in this assay, even at a concentration of compound at least 90-fold  
101 higher than the intracellular ERK5 IC<sub>50</sub> (**Fig. 1**).

102         Given these results, it seemed likely that an additional activity was responsible for the  
103 efficacy of AX15839, AX15910, and XMD8-92. However, from KiNativ profiling, there were  
104 no significant shared kinase off-targets from the more than 200 kinases profiled, at up to 10 μM  
105 compound (Supplementary Results, **Supplementary Data Set 2**). XMD8-92 was derived from  
106 the polo-like kinase (PLK1) inhibitor BI-2536<sup>19,20</sup>. Recently, BI-2536 (as well as numerous  
107 other kinase inhibitors) has been shown to inhibit the interaction between bromodomain and  
108 acetyl-lysine binding<sup>28-30</sup>. Bromodomains (BRD) are protein modules that bind to ε-N-  
109 acetylated lysine-containing sequences and modulate transcriptional processes. In particular, the  
110 bromodomain-containing BET (bromo and extra terminal) proteins BRD2, BRD3, BRD4, and  
111 BRDT are targets of drugs currently pursued in oncology, diabetes, atherosclerosis, and  
112 inflammation. In order to determine whether XMD8-92 and other ERK5 kinase inhibitors can  
113 likewise inhibit BRDs, we screened the compounds against BRD4, a well-studied and key  
114 member of the BET protein family.

115         **Table 2** shows the dissociation constants for compound binding to the first bromodomain  
116 of BRD4 ((BRD4(1)). Using the well validated, q-PCR-based BROMOScan assay (DiscoverRx  
117 Corp., San Diego, CA), two reference BRD inhibitors, JQ1<sup>31</sup> and I-BET762<sup>32</sup> exhibited potent  
118 BRD4(1) K<sub>d</sub> values that are concordant with published isothermal titration calorimetry  
119 results<sup>31,33</sup>. Analysis of the ERK5 inhibitors using this method revealed a clear split.  
120 Compounds that were active in the E-selectin assay, AX15839, AX15910 and XMD8-92,  
121 potently bound BRD4(1). In contrast, compounds that were potent on ERK5 but inactive in the  
122 E-selectin assay, AX15836 and AX15892, gave considerably higher dissociation constants.

123           Knowing that the dual ERK5/BRD inhibitors were efficacious in the E-selectin HUVEC  
124 assay whereas the ERK5-selective inhibitors had no effect (**Table 1**), we returned to that assay to  
125 measure the two BRD-selective reference inhibitors. Using only 1  $\mu$ M of I-BET762 and JQ1, we  
126 observed E-selectin reductions of 27 and 29%, respectively. Of note, neither BRD inhibitor had  
127 any significant kinase inhibition at up to 10  $\mu$ M by KiNativ profiling (data not shown). Thus it  
128 appears that TLR1/2-induced E-selectin expression in endothelial cells could be reduced by BRD  
129 inhibition but not by ERK5 inhibition.

130           We characterized the activities of several compounds from each classification type in  
131 additional cellular inflammation models and found good consistency of response. For brevity,  
132 we show the results of three representative compounds: AX15836 as the ERK5-selective  
133 inhibitor, AX15839 as the dual ERK5/BRD inhibitor, and I-BET762 as the selective BRD  
134 inhibitor. HUVECs were pre-treated with compound and stimulated with TLR1/2 agonist  
135 Pam<sub>3</sub>CSK<sub>4</sub>. Culture supernatants were subjected to immunoassay for inflammatory cytokines  
136 IL-6 and IL-8. As seen in **Table 3**, compounds with BRD inhibition (selective and dual)  
137 suppressed IL-6 and IL-8; however, the ERK5-specific inhibitor AX15836 was completely  
138 ineffective ( $EC_{50} \gg 10 \mu$ M), suggesting that it was the BRD inhibition component of the  
139 compounds that mediated cytokine reduction.

140           To determine whether the lack of ERK5-specific effect was limited to a certain cell type  
141 and agonist, we repeated the experiment using a normal human bronchial epithelial cell line,  
142 BEAS-2B. After pre-incubation with compound, cells were stimulated with the pro-  
143 inflammatory cytokine IL-17A under complete growth media conditions. Intriguingly, ERK5  
144 has been identified to be part of an IL-17-mediated signaling cascade that drives keratinocyte  
145 proliferation and tumorigenesis<sup>34</sup>. IL-17A is also overexpressed in other conditions of chronic

146 inflammation such as asthma and is thought to mediate airway neutrophilia through the induction  
147 of additional cytokines from target cells<sup>35-37</sup>. IL-6 and IL-8 cytokine release from the bronchial  
148 epithelial cells were measured by immunoassay (**Table 4**). Again, the ERK5-selective  
149 compound AX15836 had no effect on these induced cytokines. In contrast, inhibitors with BRD  
150 inhibition activity suppressed inflammatory cytokine response to IL-17A in this cell type.

151 We searched for an anti-inflammatory effect of AX15836 in additional cellular models of  
152 innate and adaptive immunity from both murine and human sources, as listed in **Supplementary**  
153 **Table 1**. Inhibition of BRD/acetyl-lysine binding with either JQ1 or I-BET762 resulted in  
154 efficacy across most models. In contrast, the ERK5-only inhibitor AX15836 was ineffective  
155 against all models tested.

156

### 157 **Transcriptome analysis of cellular ERK5 kinase inhibition**

158 Since we were unable to find effects of ERK5 inhibitor treatment on a limited number of  
159 analytes previously reported to be modulated by compounds now known to be dual  
160 ERK5/bromodomain inhibitors, we analyzed the effect of ERK5 inhibition on genome-wide gene  
161 expression. Two cellular models with reported ERK5-regulated signaling were used:  
162 Pam<sub>3</sub>CSK<sub>4</sub>-stimulated HUVECs<sup>23,38</sup> and EGF-stimulated HeLa cells<sup>20,26</sup>. Cells were pre-  
163 incubated with DMSO vehicle, AX15836 (ERK5 inhibitor), AX15839 (dual ERK5/BRD  
164 inhibitor), or I-BET762 (BRD inhibitor), then stimulated with agonist. The HUVECs were  
165 confirmed to have been stimulated by TLR1/2 activation, and inhibited by AX15839 and I-  
166 BET762, by measurement of secreted IL-6 and IL-8 in sister wells (data not shown). The HeLa  
167 cells were confirmed to have been stimulated by EGF based on the appearance of phospho-  
168 ERK5 in sister wells (data not shown).

169 RNA sequencing (RNA-Seq) of biological triplicates detected at least one transcript for  
170 18925 genes in HUVEC samples and 17266 genes in HeLa samples. In both cell lines, samples  
171 treated with AX15836 showed very few genes to be differentially expressed (**Fig. 3a**). The total  
172 number of genes using the default cut-off (adjusted p-value  $\leq 0.1$ ) for MA plots was 7 in  
173 HUVEC samples and 2 in HeLa samples. Moreover, the observed maximal fold-changes in  
174 expression when compared to the DMSO control samples were modest: below 1.6 and 2 for  
175 HUVEC and HeLa samples, respectively (data not shown). Principal component analysis of all  
176 samples further confirmed the lack of differential gene expression in samples treated with the  
177 ERK5-only inhibitor AX15836 (**Fig. 3b**). Conversely, samples treated with the dual ERK5/BRD  
178 inhibitor AX15839 and those treated with the BRD inhibitor I-BET762 showed a large number  
179 of differentially expressed genes (**Fig. 3a**). The correlation of fold-changes in expression for all  
180 genes in samples treated with AX15839 and I-BET762 is shown in **Fig. 3c**. While there were  
181 some outliers, the majority of those genes showed comparable expression patterns in that they  
182 were expressed at either higher or lower levels in each of the treated samples when compared to  
183 controls. Likewise, the overlap of genes differentially expressed in these samples was significant  
184 for both cell types (**Fig. 3d**). In fact, all genes differentially expressed in one treatment were also  
185 differentially expressed in the other, albeit to a lesser extent or with a slightly higher adjusted p-  
186 value (data not shown).  
187

188 **Figure 3. Differential gene expression in HUVEC and HeLa cells treated with AX15836,**  
 189 **AX15839, and I-BET762.**

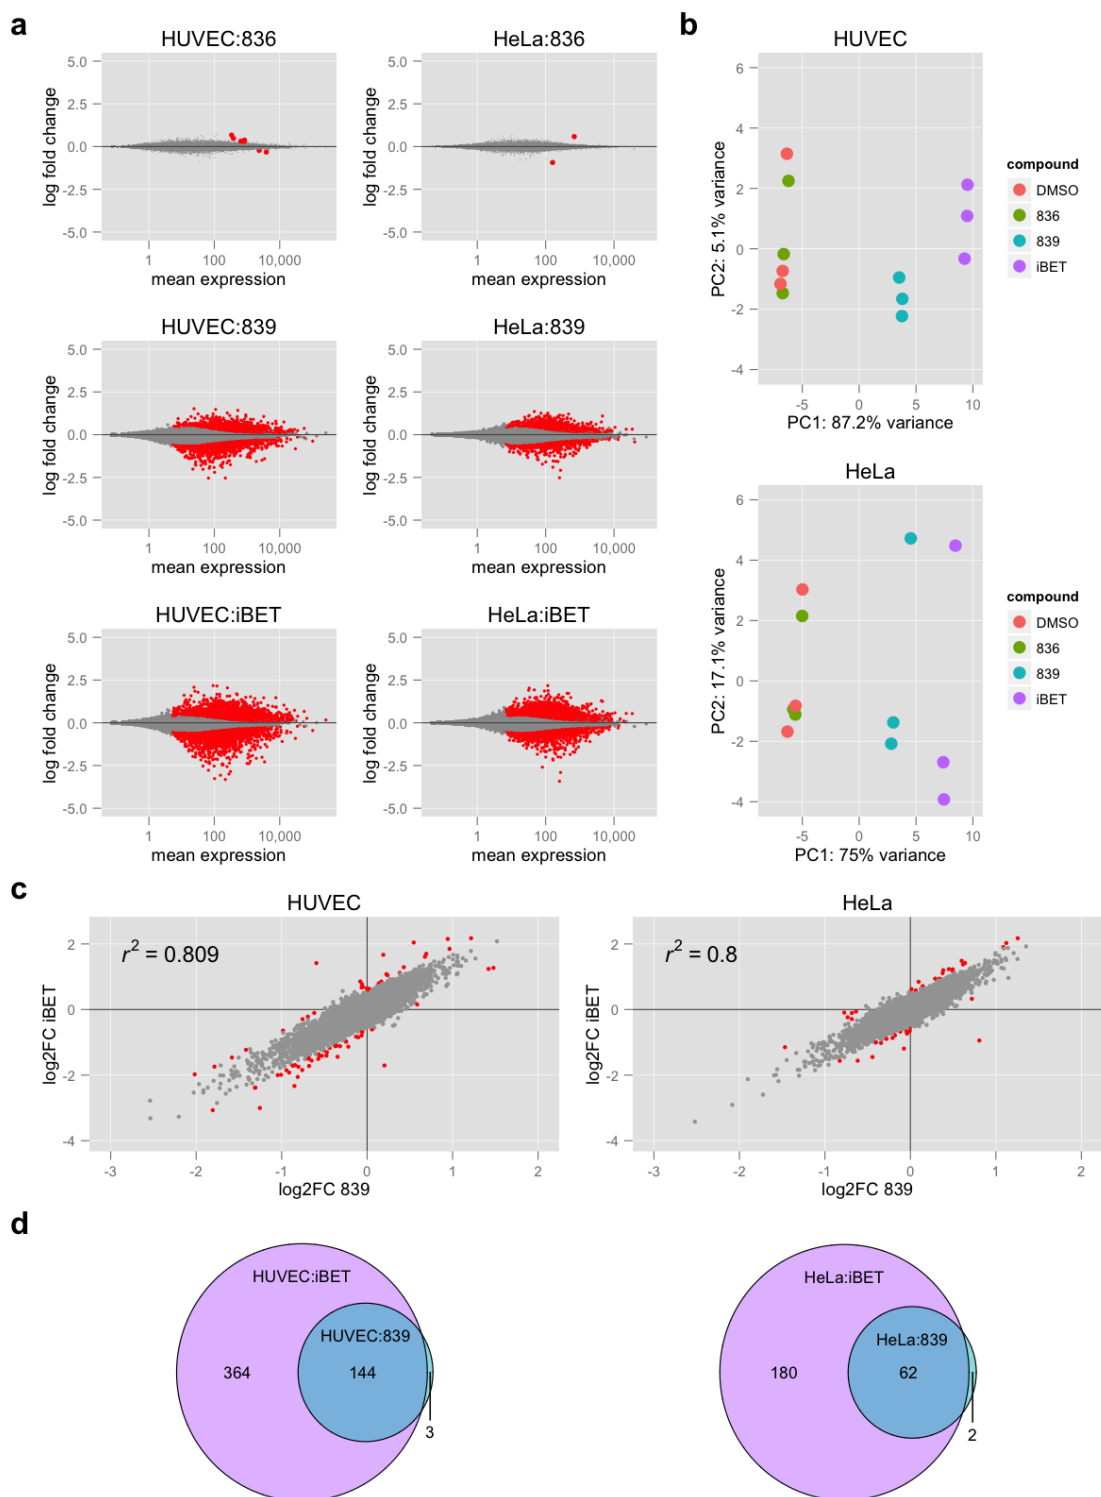

190

191 **(a)** MA plots for HUVEC (left column) and HeLa cells (right column) treated with AX15836  
192 (836, top row), AX15839 (839, middle row), and I-BET762 (iBET, bottom row). Differentially  
193 expressed genes with an adjusted p-value (DESeq2) of 0.1 or less are shown in red. **(b)** Principal  
194 component analysis of HUVEC (top) and HeLa cells (bottom) samples. **(c)** Correlation of gene  
195 expression profiles in HUVEC (left) and HeLa cells (right) treated with AX15839 and I-  
196 BET762. The log<sub>2</sub>-fold changes (log<sub>2</sub>FC) for compound-treated samples compared to the  
197 DMSO control samples are plotted for each gene. Outliers are highlighted in red and include  
198 those differentially expressed genes (at least a 1.5x fold-change and an adjusted p-value below  
199 0.05 in one of the samples) with a residual outside of three times the standard deviation of all  
200 residuals. **(d)** Venn diagrams of differentially expressed genes ( $\text{abs}(\log_2\text{FC}) > 1$  and adjusted p-  
201 value  $< 0.05$ ) in HUVEC (left) and HeLa cells (right) treated with AX15839 and I-BET762.

202

203           Looking at individual genes of interest, AX15839 and I-BET762 reduced Pam3CSK4-  
204 stimulated HUVEC gene expression of *IL6* (IL-6)(log<sub>2</sub>FC -0.72 and -1.32, respectively) and  
205 *CXCL8* (IL-8)(log<sub>2</sub>FC -0.73 and -1.42, respectively), consistent with our observation of  
206 decreased IL-6 and IL-8 protein in media of stimulated cells treated with the compounds. Gene  
207 expression of *SELE* (E-selectin) was also reduced by these compounds (log<sub>2</sub>FC -0.47 and -0.69,  
208 respectively). Additionally, both compounds with BRD inhibition (AX15839 and I-BET762)  
209 suppressed transcription of other genes involved in inflammation, such as *PTGS2* (COX-2),  
210 *CSF2* (GM-CSF), and *CCL2* (MCP-1), whereas inhibition of ERK5 kinase alone (AX15836) had  
211 no effect. Thus pharmacological inhibition of ERK5 kinase activity was not able to reduce  
212 inflammatory gene expression in endothelial cells, further supporting the concept that the  
213 previously-observed efficacy in first generation ERK5 inhibitors was due to an unrecognized  
214 inhibition of BRD/acetyl-lysine interaction.

215           EGF-mediated signaling in HeLa cells has been reported to increase transcripts for  
216 cytokines IL-6 and IL-8<sup>39</sup>. Our data from RNA-Seq indicated that BRD inhibition by AX15839  
217 and I-BET762 strongly reduced the abundance of transcripts for *IL6* (log<sub>2</sub>FC -1.73 and -2.69,  
218 respectively) and *CXCL8* (log<sub>2</sub>FC -1.90 and -2.94, respectively). However, despite HeLa ERK5  
219 phosphorylation being induced by EGF and inhibited by AX15836, we found no resulting impact  
220 on gene expression of solely inhibiting ERK5 kinase activity with AX15836.

## 221 **Discussion**

222 ERK5 was proposed to have a role in inflammation due to the activity of the exemplar ERK5  
223 inhibitor XMD8-92 and the corresponding effects of ERK5 silencing<sup>23,38,40</sup>. We have likewise  
224 observed similar reductions in inflammatory cytokine response using siRNA-mediated  
225 knockdown of ERK5 (data not shown) but upon further characterization of multiple ERK5  
226 compounds, the similarities ended. Weiss and colleagues<sup>41</sup> described examples of the  
227 uncommon disconnect between results seen with gene knockdown versus pharmacological  
228 inhibition; although widely used together for verification, it was pointed out that they should  
229 actually not be expected to always align. With ERK5, pharmacological inhibition resulted in  
230 disparate biological effects (or more precisely, a lack of effect) as compared to deletion of the  
231 ERK5 protein, which adds to the understanding of the biology. While ERK5 kinase activity is  
232 thought to be important for direct phosphorylation of transcription factors and for regulating its  
233 own behavior by autophosphorylation, there is also evidence that ERK5-mediated transcription  
234 can occur independent of its kinase activity. Using specific antibodies against phosphorylated  
235 residues in the ERK5 C-terminus, Honda and colleagues<sup>8</sup> reported on the ability of growth  
236 factor-stimulated ERK1/2 to phosphorylate ERK5 at Thr732. This phosphosite was required for  
237 the ability of ERK5 to localize to the nucleus as well as to stimulate an ERK5-specific reporter  
238 gene. Interestingly, ERK1/2 activity on a kinase-inactive ERK5 mutant (K83M) could likewise  
239 do the same, suggesting that under conditions such as growth factor stimulation, ERK5 kinase  
240 activity was not necessary for ERK5-mediated effects. Another study demonstrating alternative  
241 regulation of ERK5 phosphorylation supports the ability of ERK5 to function aside from its  
242 kinase activity: using a kinase-inactive ERK5 mutant (K83S, K84L) or just the C-terminal  
243 domain, Diez-Rodriguez and Pandiella<sup>6</sup> found that ERK5 could be phosphorylated on C-terminal



244 residues during mitosis to affect transcriptional activity, without requiring kinase activity. Thus  
245 it seems clear that ERK5 can regulate biological functions independent of its kinase activity.

246 As it turns out, XMD8-92 and other first generation ERK5 inhibitors exhibited potent  
247 BRD inhibition. Numerous kinase inhibitors, many quite selective among the kinases, have  
248 recently been shown to inhibit BRD/acetyl-lysine binding. Martin and colleagues discovered  
249 that the cyclin-dependent kinase (CDK) inhibitor dinaciclib could bind to BRDT(1) and  
250 hypothesized that other hinge-binding kinase inhibitors would also bind to bromodomains<sup>28</sup>. The  
251 group followed with an ambitious co-crystallization screening approach of BRD4(1) against a  
252 library of over 580 diverse kinase inhibitors, and indeed were able to identify 14 BRD-inhibiting  
253 compounds<sup>29</sup>. Likewise, Ciceri and colleagues used a biochemical approach to screen a library  
254 of 628 kinase-selective inhibitors (including > 200 clinical compounds) for BRD4(1) inhibition  
255 and found nine that strongly inhibited the binding of a poly-acetylated histone H4 peptide<sup>30</sup>.  
256 These studies demonstrate that kinases and bromodomains can share a high degree of  
257 pharmacophore similarity and call for an increased awareness for possible epigenetic  
258 modifications by seemingly specific kinase inhibitors.

259 Inhibition of the BET family of bromodomain-containing proteins has been shown to  
260 effectively modulate inflammation, including cytokine- or toll-like receptor-stimulated  
261 inflammatory responses<sup>33,42-44</sup>. While we did not find any anti-inflammatory effect using ERK5-  
262 specific inhibitors that lack potent BRD inhibition, we did observe efficacy that can be attributed  
263 to the BRD inhibition in dual ERK/BRD inhibitors. Preliminary experiments also found no anti-  
264 proliferative effects of our ERK5-only inhibitors, suggesting that recent reports supporting ERK5  
265 as a drug target for cancer should be subject to re-evaluation. Nonetheless, compounds such as

266 AX15836 represent a new generation of specific ERK5 inhibitors that should prove to be  
267 valuable tools for delineating the complex biology of ERK5.

268

269 **Online Methods**

270 **Materials**

271 TLR2 agonist peptide Pam<sub>3</sub>CSK<sub>4</sub> was purchased from Enzo Life Sciences (Farmingdale, NY).  
272 Recombinant human epidermal growth factor (EGF) and IL-17A were from EMD Millipore  
273 (Billerica, MA) and eBioscience (San Diego, CA), respectively. Antibodies against ERK5,  $\beta$ -  
274 actin, GAPDH, and DyLight 680 and 800 conjugated secondary antibodies were purchased from  
275 Cell Signaling Technology (Danvers, MA). Human IgG, fluorescein-conjugated anti-E-selectin  
276 (Clone BBIG-E5) and anti-IgG<sub>1</sub> isotype control antibodies were obtained from R&D  
277 Systems/Bio-Techne (Minneapolis, MN). I-BET762 and JQ1 were purchased from Selleck  
278 Chemicals (Houston, TX). XMD8-92 was purchased from Tocris/Bio-Techne as well as  
279 synthesized in house as described<sup>19</sup>. Commercial compound structures and batch purities ( $\geq$   
280 99%) were reported by the manufacturers using standard analytical methods (HPLC and NMR).

281 For compound synthesis, Compound **1** was purchased from Shanghai IS Chemical  
282 Technology. Proton nuclear magnetic resonance (<sup>1</sup>H NMR) spectra were recorded on a Bruker  
283 400 MHz NMR spectrometer in deuterated solvents using the residual <sup>1</sup>H solvent peak as the  
284 internal standard. LC/MS (ES) analysis was performed with an Agilent 1260 Infinity Series  
285 LC/MSD using ChemStation software equipped with a C<sub>18</sub> reverse phase column (Phenomenex  
286 Kinetex 5 m XB-C18 50 x 2.10 mm column, or Agilent Poreshell 120 EC-C18 3.0 x 50 mm  
287 column), or Agilent 1100 Series LC/MSD using ChemStation software equipped with a C<sub>18</sub>  
288 reverse phase column (Onyx, monolithic C18 column, 50 x 2.0 mm; Phenomenex; Torrance,  
289 CA), and using a binary system of water and acetonitrile with 0.1% trifluoroacetic acid as a  
290 modifier. Flash silica gel column chromatography was carried out on a CombiFlash R<sub>f</sub> system

291 (by Teledyne ISCO) or a Biotage SP-4 automated purification system using pre-packed silica gel  
292 cartridges. HPLC purification was performed by using an Agilent 1200 Series with a C<sub>18</sub> reverse  
293 phase column (Luna 5 u C18 (2) 100A, 150 x 21.2 mm, 5 micron; Phenomenex; Torrance, CA)  
294 and using a binary system of water and acetonitrile with 0.1% acetic acid as a modifier.

295

## 296 Synthetic Protocols

297

### 298 Scheme for the synthesis of AX15836

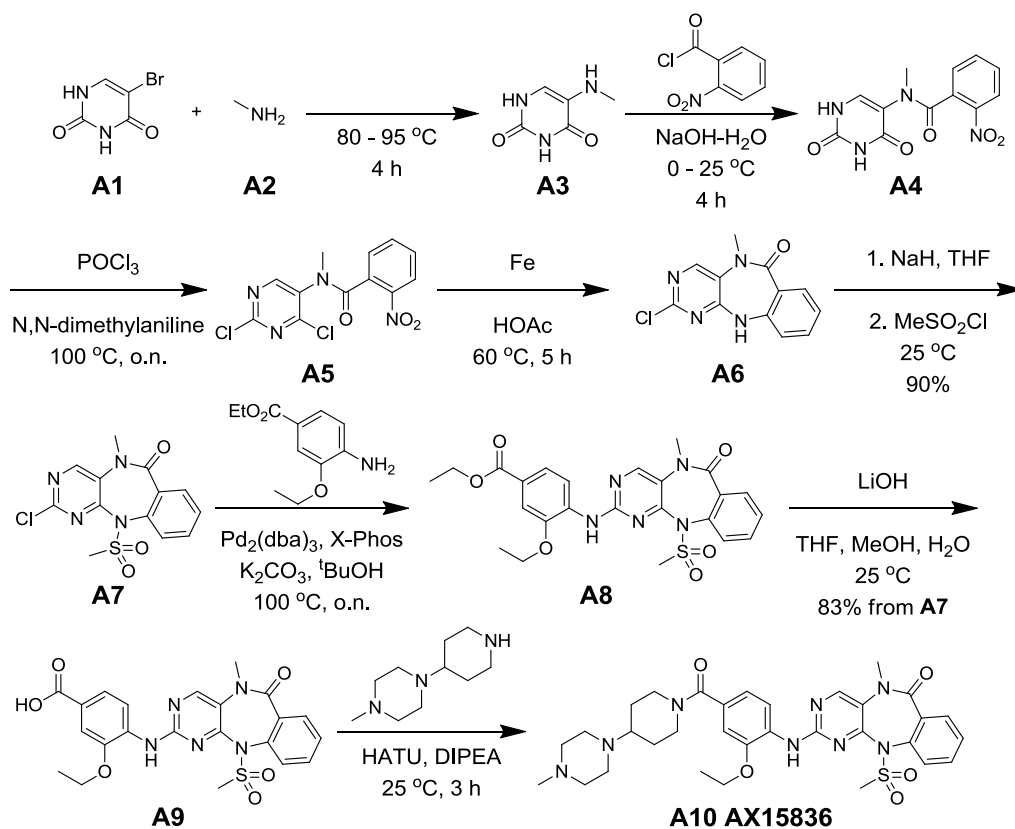

299

300

301 **5-(Methylamino)pyrimidine-2,4(1H,3H)-dione (A3).** To a 500 mL 3-neck round bottom flask  
302 filled with a condenser, 5-bromopyrimidine-2,4(1H,3H)-dione (**A1**, 20 g, 0.10 mol) and  
303 methanamine (**A2**, 40% aqueous solution, 160 mL, 1.85 mol) were added. The reaction mixture  
304 was stirred and heated at 80 °C for 3.5 hours. At 25 °C, the reaction mixture was acidified to pH  
305 ~ 4.5 with diluted HCl aqueous solution. The generated light yellow precipitates were filtered  
306 and washed with water, then dried in vacuo to provide **A3** (10.46 g, 70%) as a light yellow solid.  
307 ESMS found  $m/z$  142.1 ( $[M + H^+]$ ,  $C_5H_7N_3O_2$  requires 141.0538).

308  
309 **N-(2,4-Dioxo-1,2,3,4-tetrahydropyrimidin-5-yl)-N-methyl-2-nitrobenzamide (A4).** To a  
310 solution of **A3** (10.46 gram, 74.1 mmol) in THF (40 mL) was added NaOH aqueous solution (2.5  
311 N, 100 mL, 250 mmol) at 0 °C. Then 2-nitrobenzoyl chloride (12.8 mL, 96.8 mmol) was added  
312 slowly. The generated clear brown solution was stirred at 0 °C for 40 minutes then at room  
313 temperature for 4.5 h. The reaction mixture was acidified by diluted HCl aqueous solution and  
314 stored for 3 days. The generated light yellow solid was filtered and the cake was washed with  
315 water, then dried in vacuo to provide **A4** (13.47 g, 63%) as light yellow solid. ESMS found  $m/z$   
316 291.0 ( $[M + H^+]$ ,  $C_{12}H_{10}N_4O_5$  requires 290.0651), 313.1 ( $[M + Na^+]$ ),

317  
318 **N-(2,4-Dichloropyrimidin-5-yl)-N-methyl-2-nitrobenzamide (A5).** A solution of **A4** (7.96 g,  
319 27.4 mmol) and N,N-dimethylaniline (3 mL, 23.7 mmol) in phosphorus oxychloride ( $POCl_3$ , 135  
320 mL, 1.45 mol) was heated at 100 °C overnight. The solvent was removed by rotavapor and the  
321 residue was dried in vacuo to provide the crude product **A5**, which was used for next step  
322 reaction without further purification. ESMS found  $m/z$  327.0, 329.0 ( $[M + H^+]$ ,  $C_{12}H_8C_{12}N_4O_3$   
323 requires 325.9973, 327.9944).

324  
325 **2-Chloro-5-methyl-5H-benzo[e]pyrimido[5,4-b][1,4]diazepin-6(11H)-one (A6).** The crude  
326 **A5** (~ 27.4 mmol, from last step) was dissolved in acetic acid (100 mL), then iron (9.1 g, 163  
327 mmol) was added at 25 °C with rigorous stirring. The mixture was heated at 60 °C for 5 h. Water  
328 (100 mL) and ethanol (10 mL) were added and the reaction mixture was stirred for additional 30  
329 minutes. The precipitates were filtered and extracted between ethyl acetate and water. The  
330 combined EtOAc phase was dried over sodium sulfate and then concentrated to produce the  
331 crude **A6** (3.25 g, 46% for two steps). <sup>1</sup>H NMR (400 MHz, CDCl<sub>3</sub>) δ 8.23 (s, 1H), 7.98 (dd, *J* =  
332 1.5, 8.0, 1H), 7.45 – 7.37 (m, 1H), 7.17 – 7.09 (m, 1H), 6.82 (dd, *J* = 0.9, 8.1, 1H), 6.71 (s, 1H),  
333 3.51 (s, 3H); ESMS found *m/z* 261.1 ([M + H<sup>+</sup>], C<sub>12</sub>H<sub>9</sub>ClN<sub>4</sub>O requires 260.0465).

334  
335 **2-Chloro-5-methyl-11-(methylsulfonyl)-5H-benzo[e]pyrimido[5,4-b][1,4]diazepin-6(11H)-**  
336 **one (A7).** NaH (60%, 160.0 mg, 4.00 mmol) was added to a solution of **A6** (521.4 mg, 2.00  
337 mmol) in THF (20.0 mL) at 0 °C. The generated orange suspension was stirred at 25 °C for 30  
338 min, then MeSO<sub>2</sub>Cl (310.0 μL, 4.00 mmol) was added and the mixture was stirred at 25 °C for 1  
339 h. The reaction was quenched and diluted with H<sub>2</sub>O. The aqueous phase was extracted with  
340 EtOAc. The combined EtOAc phase was washed with sat. NaHCO<sub>3</sub> and sat. NaCl aqueous  
341 solution, then dried over Na<sub>2</sub>SO<sub>4</sub>. The dried organic phase was filtered and concentrated by  
342 rotavapor. The residue was washed with hexane, and the gum was dried in vacuo to provide the  
343 crude **A7** as a light yellow solid, which was used for next step reaction without further  
344 purification. <sup>1</sup>H NMR (400 MHz, DMSO-*d*<sub>6</sub>) δ 9.07 (s, 1H), 7.82 (dd, *J* = 1.2, 7.5, 1H), 7.74 –  
345 7.64 (m, 2H), 7.54 (ddd, *J* = 2.1, 6.5, 7.8, 1H), 3.79 (s, 3H), 3.56 (s, 3H); ESMS found *m/z* 339.0  
346 ([M + H<sup>+</sup>], C<sub>13</sub>H<sub>11</sub>ClN<sub>4</sub>O<sub>3</sub>S requires 338.0240).

347

348 **Ethyl 3-ethoxy-4-(5-methyl-11-(methylsulfonyl)-6-oxo-6,11-dihydro-5H-benzo[e]pyrimido**  
349 **[5,4-b][1,4]diazepin-2-ylamino)benzoate (A8)**. A mixture of crude **A7** (367 mg, ~ 92% purity,  
350 ~ 1.00 mmol), ethyl 4-amino-3-ethoxybenzoate (251.1 mg, 1.20 mmol), X-Phos (42.0 mg, 0.088  
351 mmol), and K<sub>2</sub>CO<sub>3</sub> (829.3 mg, 6.00 mmol) in <sup>t</sup>BuOH (10.0 mL) was bubbled with N<sub>2</sub> for 20 sec.  
352 Pd<sub>2</sub>(dba)<sub>3</sub> (54.9 mg, 0.060 mmol) was added and the mixture was bubbled with N<sub>2</sub> for additional  
353 20 sec. The mixture was then heated at 100 °C under N<sub>2</sub> overnight. The reaction mixture was  
354 diluted with hexane-EtOAc solution (10:3). The precipitates were filtered and washed with  
355 hexane-EtOAc solution (10:3). The combined filtrate was concentrated in vacuo to provide the  
356 crude **A8** as an orange solid, which was used for next step reaction without further purification.  
357 ESMS found *m/z* 512.1 ([M + H<sup>+</sup>], C<sub>24</sub>H<sub>25</sub>N<sub>5</sub>O<sub>6</sub>S requires 511.1526).

358

359 **3-Ethoxy-4-(5-methyl-11-(methylsulfonyl)-6-oxo-6,11-dihydro-5H-benzo[e] pyrimido[5,4-**  
360 **b][1,4]diazepin-2-ylamino)benzoic acid (A9)**. A solution of the crude **A8** (699.0 mg, ~ 73.2%,  
361 ~ 1.000 mmol) in THF (6.05.4 mL), MeOH (2.0 mL), and H<sub>2</sub>O (2.0 mL) was treated with LiOH  
362 hydrate (62.9 mg, 1.50 mmol) at 25 °C overnight. The reaction mixture was concentrated by  
363 rotavapor. The residue was diluted with DCM. The DCM phase was extracted with 1 N NaOH  
364 aqueous solution. The combined aqueous phase was washed with additional DCM. Then the  
365 aqueous phase was acidified with 1 N HCl aqueous solution. The generated precipitates were  
366 stirred for 10 min, filtered and washed with H<sub>2</sub>O, then dried in vacuo to provide **A9** (389.3 mg,  
367 81% for 3 steps) as a tan solid. <sup>1</sup>H NMR (400 MHz, DMSO-d<sub>6</sub>) δ 12.70 (br s, 1H), 9.02 (s, 1H),  
368 8.79 (s, 1H), 8.00 (d, *J* = 8.3, 1H), 7.78 (d, *J* = 7.8, 1H), 7.65 (s, 1H), 7.63 – 7.55 (m, 2H), 7.53

369 (s, 1H), 7.49 (s, 1H), 4.16 (m, 2H), 3.80 (s, 3H), 3.51 (s, 3H), 1.32 (t,  $J = 6.9$ , 3H); ESMS found  
370  $m/z$  484.2 ( $[M + H^+]$ ,  $C_{22}H_{21}N_5O_6S$  requires 483.1213).

371

372 **2-(2-Ethoxy-4-(4-(4-methylpiperazin-1-yl)piperidine-1-carbonyl)phenylamino)-5-methyl-**  
373 **11-(methylsulfonyl)-5H-benzo[e]pyrimido[5,4-b][1,4]diazepin-6(11H)-one (A10, AX15836).**

374 HATU (356.5 mg, 0.938 mmol) was added to a solution of **A9** (377.8 mg, 0.781 mmol), 1-  
375 methyl-4-(piperidin-4-yl)piperazine (171.9 mg, 0.938 mmol) and DIPEA (408.0  $\mu$ L, 2.34 mmol)  
376 in DMF (3.9 mL) at 25 °C. The mixture was stirred at 25 °C for 3 h. The reaction mixture was  
377 dried in vacuo. The residue was purified by HPLC to provide the acetic acid salt of **A10**

378 (**AX15836**, 140 mg, 98% purity, 28%) as a white solid.  $^1H$  NMR (400 MHz, DMSO- $d_6$ )  $\delta$  9.02  
379 (s, 1H), 8.73 (s, 1H), 7.80 – 7.75 (m, 1H), 7.72 (d,  $J = 8.0$ , 1H), 7.67 – 7.57 (m, 2H), 7.48 (dd,  $J$   
380 = 5.1, 11.1, 1H), 7.03 (d,  $J = 1.6$ , 1H), 7.00 – 6.93 (m, 1H), 4.58 – 4.26 (m, 1H), 4.16 – 4.01 (m,  
381 2H), 3.74 (s, 3H), 3.72 – 3.55 (m, 1H), 3.49 (s, 3H), 3.15 – 2.88 (m, 1H), 2.86 – 2.63 (m, 1H),  
382 2.55 (d,  $J = 0.5$ , 3H), 2.50 (m, 5H), 2.29 (m, 3H), 2.13 (s, 3H), 1.79 (m, 2H), 1.37 (m, 2H), 1.24  
383 (t,  $J = 6.9$ , 3H).  $^{13}C$  NMR (400 MHz, DMSO- $d_6$ )  $\delta$  169.01, 166.02, 157.48, 156.06, 155.74,  
384 150.69, 140.68, 133.32, 132.97, 132.20, 130.63, 129.05, 128.70, 125.74, 124.63, 123.18, 119.12,  
385 111.33, 64.38, 61.31, 55.60, 48.99, 46.23, 45.42, 40.83, 37.36, 24.44, 14.91; ESMS found  $m/z$   
386 649.3 ( $[M + H^+]$ ,  $C_{32}H_{40}N_8O_5S$  requires 648.2842).

387

388 **Scheme for the synthesis of AX15839 & AX15910**



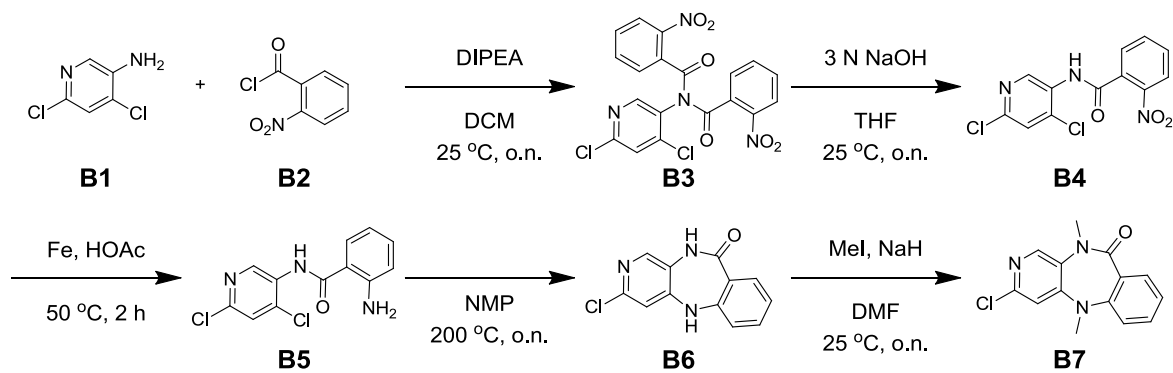

390 **N-(4, 6-Dichloropyridin-3-yl)-2-nitro-N-(2-nitrobenzoyl)benzamide (B3)**. 2-Nitrobenzoyl  
391 chloride (**B2**, 11.10 mL, 84.0 mmol) was added slowly to a solution of 5-amino-2, 4-  
392 dichloropyridine (**B1**, 6.520 g, 40.0 mmol) and DIPEA (27.9 mL, 160 mmol) in DCM (100 mL)  
393 at 0 °C under N<sub>2</sub>. The mixture was then stirred at 25 °C for 1.5 h. The reaction mixture was  
394 concentrated by rotavapor. And the residue **B3** (brown syrup) was used for the next step without  
395 further purification.

396  
397 A small amount of the reaction mixture was diluted with DCM, and washed with H<sub>2</sub>O, sat.  
398 NaHCO<sub>3</sub> aqueous solution and sat. NaCl aqueous solution, then dried over Na<sub>2</sub>SO<sub>4</sub>. The dried  
399 organic phase was filtered and concentrated. The residue was rinsed with small amount of DCM  
400 and the remaining precipitates were dried in vacuo to provide **B3** as a white solid. <sup>1</sup>H NMR (400  
401 MHz, DMSO-d<sub>6</sub>) δ 8.63 (s, 1H), 8.24 (d, *J* = 8.3, 2H), 8.08 (d, *J* = 1.0, 1H), 7.97 – 7.80 (m, 4H),  
402 7.75 (t, *J* = 7.8, 2H); ESMS found *m/z* 461.0 ([*M* + H<sup>+</sup>], C<sub>19</sub>H<sub>10</sub>Cl<sub>2</sub>N<sub>4</sub>O<sub>6</sub> requires 459.9977),  
403 483.0 [*M* + Na<sup>+</sup>].

404  
405 **N-(4, 6-Dichloropyridin-3-yl)-2-nitrobenzamide (B4)**. A suspension of above crude **B3** (~ 40.0  
406 mmol) in THF (90 mL) and NaOH aqueous solution (~ 3.5 N, 72 mL, ~ 252 mmol) was stirred

407 rigorously at 25 °C overnight. The reaction mixture was diluted with sat. NaCl aqueous solution.  
408 The aqueous phase was extracted with EtOAc. The combined organic phase was washed with  
409 sat. NaHCO<sub>3</sub> and sat. NaCl solution, then dried over NaSO<sub>4</sub>. Filtration and concentration in  
410 vacuo provided **B4** (11.24 g, 90% for two steps) as a pale white solid. <sup>1</sup>H NMR (400 MHz,  
411 CDCl<sub>3</sub>) δ 9.42 (br s, 1H), 8.19 (dd, *J* = 1.0, 8.2, 1H), 7.74 (m, 4H), 7.45 (s, 1H); ESMS found  
412 *m/z* 312.0, 314.0 ([M + H<sup>+</sup>], C<sub>12</sub>H<sub>7</sub>Cl<sub>2</sub>N<sub>3</sub>O<sub>3</sub> requires 310.9864, 312.9835), 334.0, 336.0 [M +  
413 Na<sup>+</sup>].

414

415 **2-Amino-N-(4, 6-dichloropyridin-3-yl)benzamide (B5)**. A suspension of **B4** (12.48 g, 35.80  
416 mmol) and Fe (4.47 g, 80.0 mmol) in HOAc (80 mL) was heated at 50 °C with rigorous stirring  
417 under N<sub>2</sub> for 2 h. Additional Fe (1.12 g, 10 mmol) was added twice during 2 h. The reaction  
418 mixture was stirred at 50 °C for additional 1 h. At 25 °C, the extra Fe was removed with a  
419 magnetic bar. The reaction mixture was quenched with 1 N NaOH aqueous solution and the  
420 aqueous solution was saturated with NaCl. The product was extracted by EtOAc (multiple times  
421 and monitored by LCMS). The combined EtOAc phase was washed with sat. NaHCO<sub>3</sub> solution  
422 and sat. NaCl solution, then dried over Na<sub>2</sub>SO<sub>4</sub>. Filtration and concentration in vacuo to provide  
423 **B5** (10.26 g, 91%) as a pale white solid. <sup>1</sup>H NMR (400 MHz, DMSO-d<sub>6</sub>) δ 10.07 (br s, 1H), 8.56  
424 (s, 1H), 7.94 (t, *J* = 1.6, 1H), 7.74 (dd, *J* = 1.4, 8.0, 1H), 7.25 (ddd, *J* = 1.5, 7.1, 8.4, 1H), 6.78  
425 (dd, *J* = 0.9, 8.3, 1H), 6.67 – 6.58 (m, 1H), 6.53 (br s, 2H); ESMS found *m/z* 282.1, 284.0 ([M +  
426 H<sup>+</sup>], C<sub>12</sub>H<sub>9</sub>Cl<sub>2</sub>N<sub>3</sub>O requires 281.0123, 283.0093), 304.0, 306.0 [M + Na<sup>+</sup>].

427

428 **3-Chloro-5H-benzo[e]pyrido[3,4-b][1,4]diazepin-10(11H)-one (B6).** A suspension of **B5**  
429 (10.263 g, 36.38 mmol) in NMP (80.0 mL) was heated at 200 °C under N<sub>2</sub> for 4 h. At 25 °C, a  
430 diluted HCl aqueous solution (0.33 N, 240 mL) was added. The generated suspension was stirred  
431 at 25 °C for 1 h. The precipitates were filtered and washed with H<sub>2</sub>O, then dried in vacuo to  
432 provide **B6** (8.623 g, 96%) as a yellow solid. <sup>1</sup>H NMR (400 MHz, DMSO-d<sub>6</sub>) δ 10.05 (s, 1H),  
433 8.76 (s, 1H), 7.85 (s, 1H), 7.80 – 7.68 (m, 1H), 7.47 – 7.32 (m, 1H), 6.96 (m, 3H); ESMS found  
434 *m/z* 246.1 ([M + H<sup>+</sup>], C<sub>12</sub>H<sub>8</sub>ClN<sub>3</sub>O requires 245.0356), 268.0 [M + Na<sup>+</sup>].

435  
436 **3-Chloro-5,11-dimethyl-5H-benzo[e]pyrido[3,4-b][1,4]diazepin-10(11H)-one (B7).** NaH  
437 (60%, 2.15 g, 53.9 mmol) was added portionwise to a suspension of **B6** (5.513 g, 22.4 mmol)  
438 and MeI (3.36 mL, 53.9 mmol) in anhydrous DMF (67.3 mL) at 0 °C under N<sub>2</sub>. The reaction  
439 mixture was then stirred at 25 °C under N<sub>2</sub> overnight. At 0 °C, the diluted HCl aqueous solution  
440 (0.25 N) was added slowly to the generated suspension reaction mixture. The mixture was stirred  
441 at 25 °C for 1 h. Hexanes was added and the mixture was stirred at 25 °C for additional 1 h. The  
442 generated precipitates were filtered and washed with H<sub>2</sub>O, then dried in vacuo to provide **B7**  
443 (5.145 g, 84%) as yellow solid. <sup>1</sup>H NMR (400 MHz, DMSO-d<sub>6</sub>) δ 8.36 (s, 1H), 7.65 (dd, *J* = 1.7,  
444 7.7, 1H), 7.55 – 7.44 (m, 1H), 7.34 (s, 1H), 7.23 – 7.11 (m, 2H), 3.45 (s, 3H), 3.31 (s, 3H);  
445 ESMS found *m/z* 274.1 ([M + H<sup>+</sup>], C<sub>14</sub>H<sub>12</sub>ClN<sub>3</sub>O requires 273.0669), 296.1 [M + Na<sup>+</sup>].

446

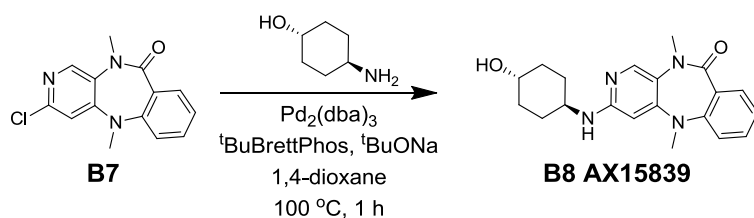

447

448 **3-((1*r*,4*r*)-4-Hydroxycyclohexylamino)-5,11-dimethyl-5H-benzo[e]pyrido[3,4-**  
449 **b][1,4]diazepin-10(11H)-one (B8, AX15839).** A mixture of **B7** (4.13 g, 15.1 mmol), *trans*-4-  
450 aminocyclohexanol (2.09 g, 18.1 mmol), Pd<sub>2</sub>(dba)<sub>3</sub> (691 mg, 0.755 mmol), <sup>t</sup>BuBrettPhos (732  
451 mg, 1.51 mmol), and <sup>t</sup>BuONa (5.08 g, 52.9 mmol) in 1,4-dioxane (150 mL) was bubbled with N<sub>2</sub>  
452 at 25 °C then stirred at 100 °C for 1 h. After cooling to room temperature, the reaction mixture  
453 was filtered *through a pad* of Celite pad, then the solvent was removed under reduced pressure.  
454 After the purification by silica gel column chromatography (Biotage Ultra 100 g, toluene to 15%  
455 ethanol-toluene), the residue was suspended with ethyl acetate. The precipitate was collected by  
456 filtration and then dried in vacuo to afford **B8** (2.30 g, 95% purity, 43%) as a pale yellow solid.  
457 <sup>1</sup>H NMR (400 MHz, DMSO-*d*<sub>6</sub>) δ 1.11-1.20 (4H, m), 1.80-1.88 (4H, s), 3.17 (3H, s), 3.37 (3H,  
458 s), 3.38 (1H, brs), 3.57-3.58 (1H, m), 4.50 (1H, d, *J* = 4.4 Hz), 6.18 (1H, s), 6.34 (1H, d, *J* = 8.0  
459 Hz), 7.11 (1H, t, *J* = 8.0 Hz), 7.17 (1H, d, *J* = 8.0 Hz), 7.45 (1H, t, *J* = 8.0 Hz), 7.60 (1H, d, *J* =  
460 8.0 Hz), 7.92 (1H, s); <sup>13</sup>C NMR (101 MHz, DMSO-*d*<sub>6</sub>) δ 167.95, 157.12, 156.33, 151.78,  
461 142.88, 132.53, 131.82, 127.50, 123.79, 123.51, 117.31, 96.42, 68.87, 49.08, 38.14, 36.75, 34.50,  
462 34.46, 31.05, 30.96; HRESIMS found *m/z* 353.19729 ([M+H<sup>+</sup>], C<sub>20</sub>H<sub>24</sub>N<sub>4</sub>O<sub>2</sub> requires 352.1899).

463

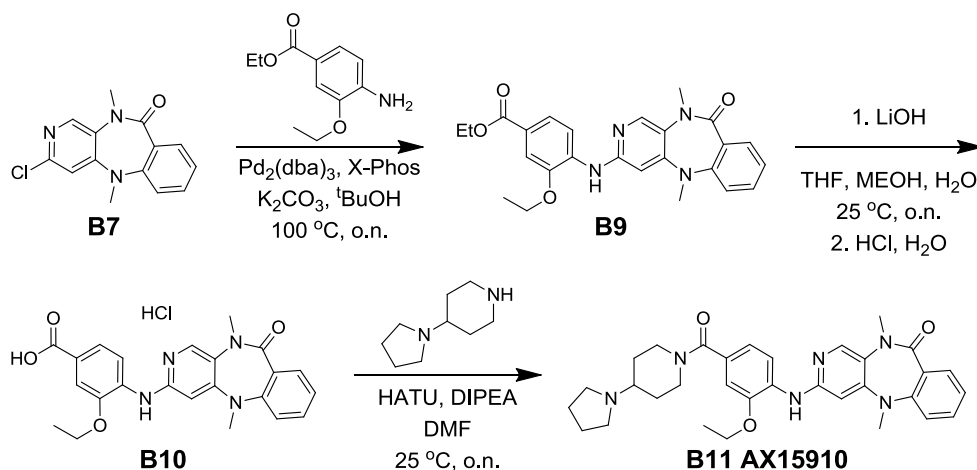

464

465 **Ethyl 4-(5,11-dimethyl-10-oxo-10,11-dihydro-5H-benzo[e]pyrido[3,4-b][1,4]diazepin-3-**  
466 **ylamino)-3-ethoxybenzoate (B9).** A mixture of **B7** (4.927 g, 18.0 mmol), ethyl 4-amino-3-  
467 ethoxybenzoate (4.520 g, 21.6 mmol), X-Phos (755.1 mg, 1.58 mmol), and K<sub>2</sub>CO<sub>3</sub> (14.93 g,  
468 108.0 mmol) in <sup>t</sup>BuOH (90 mL) was bubbled with N<sub>2</sub> for 30 sec. Pd<sub>2</sub>(dba)<sub>3</sub> (494.5 mg, 0.540  
469 mmol) was added and the mixture was bubbled with N<sub>2</sub> for additional 1 minute. The suspension  
470 was then heated at 100 °C (flushed with condenser) under N<sub>2</sub> for 23 h. The reaction mixture was  
471 diluted with EtOAc at 25 °C. The suspension was filtered through a premade Celite filter column  
472 and the precipitates were washed with EtOAc. The filtrate was washed with 0.5 N HCl aqueous  
473 solution and sat. NaCl aqueous solution, then dried over Na<sub>2</sub>SO<sub>4</sub>. The organic solution was  
474 filtrated and concentrated by rotavapor. The residue was diluted with CH<sub>3</sub>CN. The small amount  
475 of insoluble yellow solid was filtered and the CH<sub>3</sub>CN filtrate was concentrated and dried in  
476 vacuo to provide the crude **B9** as a yellow solid, which was used for next step reaction without  
477 further purification. ESMS found *m/z* 447.2 ([M+H<sup>+</sup>], C<sub>25</sub>H<sub>26</sub>N<sub>4</sub>O<sub>4</sub> requires 446.1954), 469.1 [M  
478 + Na<sup>+</sup>].

479

480 **4-(5,11-Dimethyl-10-oxo-10,11-dihydro-5H-benzo[e]pyrido[3,4-b][1,4]diazepin-3-ylamino)-**  
481 **3-ethoxybenzoic acid (B10).** The crude **B9** (~ 78.5% pure, 10.00 g, ~ 17.6 mmol) was dissolved  
482 in THF (52.7 mL), MeOH (17.6 mL) and H<sub>2</sub>O (17.6 mL). LiOH monohydrate (2.066 g, 49.2  
483 mmol) was added and the mixture was stirred at 25 °C for 4 h. Additional LiOH monohydrate  
484 (1.033 g, 24.6 mmol) and H<sub>2</sub>O (10 mL) were added and the mixture was stirred at 25 °C for  
485 additional 1.5 h. The reaction mixture was concentrated by rotavapor. The residue was diluted  
486 with 0.5 N NaOH aqueous solution. The basic aqueous phase was washed with ether then  
487 acidified with 3 N HCl solution. The generated precipitates were filtered and washed with H<sub>2</sub>O,

488 and rinsed with small amount of EtOAc, then dried in vacuo to provide **B10** (6.071 g, 81% for  
489 two steps) as a tan solid.  $^1\text{H}$  NMR (400 MHz, DMSO- $d_6$ )  $\delta$  9.65 – 9.27 (br s, 1H), 8.14 (s, 1H),  
490 8.00 (br s, 1H), 7.68 (dd,  $J = 1.7, 7.7$ , 1H), 7.64 – 7.44 (m, 3H), 7.29 (d,  $J = 8.1$ , 1H), 7.20 (t,  $J =$   
491 7.5, 1H), 7.05 (s, 1H), 4.17 (q,  $J = 7.0$ , 2H), 3.45 (s, 3H), 3.33 (s, 3H), 1.33 (t,  $J = 6.9$ , 3H);  
492 ESMS  $m/z$ : 419.1 [ $\text{M} + \text{H}^+$ ]. ESMS found  $m/z$  419.1 ( $[\text{M} + \text{H}^+]$ ,  $\text{C}_{23}\text{H}_{22}\text{N}_4\text{O}_4$  requires 418.1641).

493  
494 **3-(2-Ethoxy-4-(4-(pyrrolidin-1-yl)piperidine-1-carbonyl)phenylamino)-5,11-dimethyl-5H-**  
495 **benzo[e]pyrido[3,4-b][1,4]diazepin-10(11H)-one (B11, AX15910).** To a solution of **B10** (2.40  
496 g, 5.74 mmol) and 4-pyrrolidin-1-ylpiperidine (1.062 g, 6.88 mmol) in DMF (30 mL) were add  
497 DIPEA (4.00 mL, 22.9 mmol) and HATU (3.053 g, 8.03 mmol) at 25 °C. The reaction mixture  
498 was stirred at 25 °C for 2 h and then concentrated by a lyophilizer. Water was added to the  
499 residue and the mixture was stirred at 25 °C for 30 minutes. The generated precipitates were  
500 filtered and purified by prep HPLC. Lyophilization of the pure product fractions provided **B11**  
501 (**AX15910**, 2.15 g, > 95% purity, 68%) as a white powder.  $^1\text{H}$  NMR (400 MHz,  $\text{CDCl}_3$ )  $\delta$  8.11 –  
502 8.01 (m, 2H), 7.83 (dd,  $J = 1.7, 7.7$ , 1H), 7.45 – 7.36 (m, 1H), 7.12 (dd,  $J = 3.1, 10.7$ , 2H), 7.06 –  
503 6.96 (m, 3H), 6.53 (s, 1H), 4.13 (q,  $J = 7.0$ , 2H), 3.57 (s, 3H), 3.31 (s, 3H), 2.93 (s, 2H), 2.75 (s,  
504 4H), 2.47 (s, 1H), 2.02 (s, 1H), 2.02 – 1.92 (m, 2H), 1.87 (s, 4H), 1.65 (s, 2H), 1.47 (t,  $J = 7.0$ ,  
505 3H);  $^{13}\text{C}$  NMR (101 MHz, DMSO- $d_6$ )  $\delta$  169.47, 167.90, 156.31, 153.96, 151.73, 147.11, 142.17,  
506 132.81, 132.09, 132.00, 128.59, 127.17, 126.78, 123.70, 119.78, 117.90, 117.48, 111.03, 100.84,  
507 64.48, 61.20, 51.27, 40.38, 38.16, 23.38, 17.20, 15.06; ESMS found  $m/z$  555.3 ( $[\text{M} + \text{H}^+]$ ,  
508  $\text{C}_{32}\text{H}_{38}\text{N}_6\text{O}_3$  requires 554.3005), 1131.6 [ $2\text{M} + \text{Na}^+$ ].

509

510 **Scheme of synthesis of AX15892**

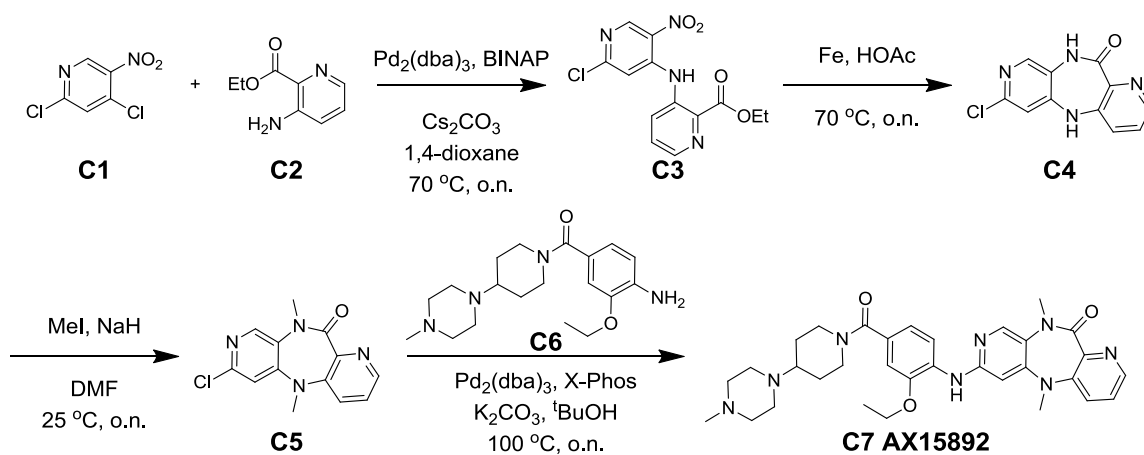

512 **Ethyl 3-[(2-chloro-5-nitro-4-pyridyl)amino]pyridine-2-carboxylate (C3).** A mixture of 2,4-  
 513 dichloro-5-nitro-pyridine (**C1**, 1.0 g, 5.2 mmol), ethyl 3-aminopyridine-2-carboxylate (**C2**, 0.86  
 514 g, 5.2 mmol), Cs<sub>2</sub>CO<sub>3</sub> (3.38 g, 10.4 mmol) and BINAP (0.19 g, 0.31 mmol) in anhydrous 1,4-  
 515 dioxane (133 mL) was degassed with N<sub>2</sub> at 25 °C, then Pd<sub>2</sub>(dba)<sub>3</sub> (0.19 g, 0.21 mmol) was added.  
 516 The mixture was degassed again and heated at 70 °C overnight. The reaction was filtered through  
 517 Celite and washed with DCM. The filtrate was concentrated, and the resulting residue was  
 518 purified by silica gel flash chromatography using EtOAc / Hexane as eluent solution. The  
 519 product containing fractions were concentrated to provide **C3** (0.653 g, 39 %) as a yellow solid.  
 520 <sup>1</sup>H NMR (400 MHz, CDCl<sub>3</sub>) δ 11.48 (s, 1H), 9.18 (s, 1H), 8.71 – 8.60 (m, 1H), 8.02 (d, *J* = 8.4,  
 521 1H), 7.64 (dd, *J* = 4.5, 8.4, 1H), 7.27 (s, 1H), 4.58 (q, *J* = 7.1, 2H), 1.50 (t, *J* = 7.1, 3H); ESMS  
 522 found *m/z* 323.1 ([*M* + H<sup>+</sup>], C<sub>13</sub>H<sub>11</sub>ClN<sub>4</sub>O<sub>4</sub> requires 322.0469).

523

524 **7-Chloro-5H-dipyrido[3,4-b:3',2'-e][1,4]diazepin-11(10H)-one (C4).** To a solution of **C3** (653  
 525 mg, 2.02 mmol) in AcOH (10 mL) was added Fe powder (560 mg, 10.1 mmol) at 25 °C. The  
 526 mixture was then heated at 70 °C overnight. The Fe was removed with a magnetic stirring rod.  
 527 The reaction mixture was concentrated and dried in vacuo to provide **C4** (0.50 g, 84 %) as an

528 off-white solid, which was used for next step reaction without further purification. ESMS found  
529  $m/z$  247.1 ( $[M + H^+]$ ,  $C_{11}H_7ClN_4O$  requires 246.0308), 269.0  $[M + Na^+]$ , 515.0  $[2M + Na^+]$ .

530

531 **2-Chloro-5,11-dimethyl-5H-benzo[e]pyrimido[5,4-b][1,4]diazepin-6(11H)-one (C5)**. To a  
532 suspension of **C4** (0.50 g, 2.0 mmol) and MeI (0.30 mL, 4.8 mmol) in anhydrous DMF (10.0  
533 mL) was added NaH (60%, 0.19 g, 4.8 mmol) at 0 °C under  $N_2$ . The reaction mixture was stirred  
534 at 0 °C for 10 min then warmed at 25 °C overnight. The reaction was quenched with 0.5 N HCl  
535 aqueous solution at 0 °C and stirred at 25 °C for additional 1 h. The precipitate was filtered,  
536 washed with 1 N HCl aqueous solution,  $H_2O$ , and hexanes, then dried in vacuo to provide **C3** as  
537 a solid (0.44 g, 80 %). ESMS found  $m/z$  275.1 ( $[M + H^+]$ ,  $C_{13}H_{11}ClN_4O$  requires 274.0621).

538

539 **7-((2-Ethoxy-4-(4-(4-methylpiperazin-1-yl)piperidine-1-carbonyl)phenyl)amino)-5,10-**  
540 **dimethyl-5H-dipyrido[3,4-b:3',2'-e][1,4]diazepin-11(10H)-one (C6, AX15892)**. A mixture of  
541 **C5** (25 mg, 0.091 mmol), **C6** (34.7 mg, 0.100 mmol),  $K_2CO_3$  (37.7 mg, 0.273 mmol),  $Pd_2(dba)_3$   
542 (5.0 mg, 0.0055 mmol), and X-Phos (3.8 mg, 0.0080 mmol) in  $t$ -Butanol (1 mL) was purged with  
543 nitrogen gas several times, then was heated in a sealed vial at 100 °C overnight. At 25 °C, the  
544 reaction mixture was filtered through a short celite column, and washed with methanol. The  
545 filtrate was concentrated and the residue was purified by HPLC to obtain the product **C7**  
546 (**AX15892**, 2.07 mg, 95% purity, 3.9%) as a white powder.  $^1H$  NMR (400 MHz,  $DMSO-d_6$ )  $\delta$   
547 ppm 1.27 - 1.43 (m, 2 H) 1.39 (t,  $J = 6.95$  Hz, 3 H) 1.70 - 1.82 (m, 2 H) 1.86 (s, 4 H) 2.12 (s, 3  
548 H) 2.18 - 2.36 (m, 4 H) 2.37 - 2.48 (m, 4 H) 3.27 (s, 3 H) 3.46 (s, 3 H) 4.14 (q,  $J = 6.82$  Hz, 2 H)  
549 6.91 (dd,  $J = 8.21, 1.64$  Hz, 1 H) 6.98 (d,  $J = 1.77$  Hz, 1 H) 7.03 (s, 1 H) 7.48 (dd,  $J = 8.46, 4.42$



550 Hz, 1 H) 7.72 (dd,  $J = 8.59, 1.01$  Hz, 1 H) 8.21 (s, 1 H) 8.24 (s, 1 H) 8.32 (d,  $J = 8.34$  Hz, 1 H)  
551 8.37 (dd,  $J = 4.42, 1.14$  Hz, 1 H); ESMS found  $m/z$  585.0 ( $[M + H]^+$ ),  $C_{32}H_{40}N_8O_3$  requires  
552 584.3223).

553

#### 554 **Cell culture and live cell KiNativ™**

555 Primary human umbilical vein endothelial cells (HUVECs) were grown in complete EGM-2  
556 media (Lonza, Walkersville, MD) and used at passages 2-3. HeLa cells were kindly provided by  
557 Dr. Jiing-Dwan Lee (Scripps Research Institute, Department of Immunology, La Jolla, CA) and  
558 maintained in Eagles Minimum Essential Media (EMEM) containing 10% (v/v) charcoal-dextran  
559 treated, heat-inactivated FBS (Omega Scientific, Tarzana, CA), and 1x  
560 Penicillin/Streptomycin/Amphotericin B (Lonza, Walkersville, MD). The virally immortalized,  
561 normal human bronchial epithelial cell line BEAS-2B was purchased from ATCC (Manassas,  
562 VA) and grown in complete BEGM media (Lonza). All cells were grown at 37°C in a  
563 humidified atmosphere at 5% CO<sub>2</sub>.

564 For determination of cellular kinase engagement, the KiNativ chemoproteomics platform  
565 was used. In live cell KiNativ, human PBMCs (Astarte Biologics, Bothell, WA) or Jurkat cells  
566 (ATCC) were incubated with compound for one hour at 37°C in a humidified atmosphere with  
567 5% CO<sub>2</sub>, washed, and collected for KiNativ analysis as previously described<sup>24</sup>.

568

#### 569 **Detection of E-selectin**

570 HUVECs were pre-treated with compound or DMSO vehicle (0.1% final volume) in complete  
571 media for one hour at 37°C in a humidified atmosphere with 5% CO<sub>2</sub>. Cells were then  
572 stimulated with 10 µg/mL Pam<sub>3</sub>CSK<sub>4</sub> for 4 hrs. After brief trypsinization for detachment and  
573 dispersion, the cells were neutralized, filtered through a 40 micron cell strainer, and washed in  
574 cold flow cytometry staining buffer (FCSB)(eBioscience). Cells were incubated with 10 ug/mL  
575 human IgG in FCSB for 15 min on ice to block nonspecific Fc binding, and then incubated with  
576 2.5 ug/mL fluorescein-anti-E-selectin antibody for 1 hr on ice. After washing, the cells were  
577 analyzed by flow cytometry on the Attune flow cytometer (Applied Biosystems/ThermoFisher  
578 Scientific). Pam<sub>3</sub>CSK<sub>4</sub>-stimulated, DMSO-treated cells incubated with a fluorescein-labeled,  
579 IgG<sub>1</sub> isotype control primary antibody were determined to exhibit no change in fluorescein signal  
580 relative to non-stimulated, DMSO-treated cells stained with the fluorescein-conjugated anti-E-  
581 selectin antibody, therefore the latter was used as the baseline control. Cells were first gated  
582 using forward vs side scatter, then 60,000 cells were analyzed for a gain in fluorescein signal  
583 relative to unstimulated DMSO-treated cells.

584

#### 585 **HeLa ERK5 auto-phosphorylation assay**

586 HeLa cells were pre-treated with compound or DMSO vehicle in FBS-containing EMEM culture  
587 media and incubated for 1 h at 37°C in a humidified atmosphere at 5% CO<sub>2</sub>. Compounds were  
588 tested in a 7-point serial dilution series ranging from 37.5 µM to 2.4 nM. Cells were left  
589 unstimulated or stimulated with 50 ng/mL EGF for 15 minutes then directly lysed in Laemmli  
590 sample buffer. Proteins in whole cell lysates were separated via SDS-polyacrylamide gel  
591 electrophoresis using 8% gels (Novex/ThermoFisher Scientific). ERK5 was detected by Western

592 blot analysis using anti-human Erk5 polyclonal antibody and normalized to GAPDH or  $\beta$ -Actin.  
593 Phosphorylated ERK5 was observable as a slower migrating band. Fluorescent signal from the  
594 secondary detection antibodies was detected and quantified using the Odyssey Imaging System  
595 (LI-COR Biotechnology, Lincoln, NE).  $EC_{50}$  values were determined using GraphPad Prism  
596 software v5.04 (GraphPad Software, La Jolla, CA) after normalization to GAPDH or  $\beta$ -Actin.

597

### 598 **Cytokine immunoanalyses**

599 Cells in their respective growth media were seeded at  $1-2 \times 10^5$  cells/well and allowed to adhere  
600 at  $37^\circ\text{C}$  in a humidified atmosphere with 5%  $\text{CO}_2$ . Cells were pre-treated with DMSO vehicle or  
601 compound in a 4-point serial dilution series from 10 to  $0.08 \mu\text{M}$  for 1 h, after which cells were  
602 left unstimulated or stimulated with either  $10 \mu\text{g/mL}$  Pam<sub>3</sub>CSK<sub>4</sub> or  $50 \text{ ng/mL}$  IL-17A. Cells  
603 were incubated for 48 hours, after which the supernatant was collected for cytokine analyses.  
604 Cytokines were individually determined by ELISA (Life Technologies/ThermoFisher Scientific)  
605 or by multiplex immunoassay (Bio-Rad, Hercules, CA). ELISA absorbance was read at 450 nm  
606 using the Wallac 1420 Victor<sup>2</sup> multilabel microplate reader (Perkin Elmer, Waltham, MA),  
607 whereas fluorescence of multiplex magnetic beads was quantified using the Bio-Plex MAGPIX  
608 multiplex reader (Bio-Rad).  $EC_{50}$  values were determined using GraphPad Prism software, with  
609 cytokine levels from cells treated with DMSO + stimulation normalized as 100%, and  
610 nonstimulated concentrations set as 0%.

611

### 612 **Preparation of cell samples for RNA-Seq**

613 HUVEC or HeLa cells were plated in triplicate in 6-well tissue culture-coated dishes and allowed  
614 to adhere overnight. Cells were pre-incubated with DMSO vehicle (0.1% final concentration), 1

615  $\mu\text{M}$  AX15836 (ERK5 inhibitor), 5  $\mu\text{M}$  AX15839 (dual ERK5/BRD inhibitor), or 1  $\mu\text{M}$  I-  
616 BET762 (BRD inhibitor) for 1 hr. HUVEC and HeLa cells were then stimulated with their  
617 respective agonists (10  $\mu\text{g}/\text{mL}$  Pam<sub>3</sub>CSK<sub>4</sub> or 50 ng/mL EGF) for 5 hrs. Cells were processed to  
618 total RNA using the RNeasy kit (Qiagen, Valencia, CA). RNA was sent to the Scripps Research  
619 Next Generation Sequencing Core Facility (La Jolla, CA) for RNA-Seq.

620 One microgram total RNA from each sample was ribodepleted using the Ribo-Zero-  
621 rRNA Removal Kit (Epicentre, Madison, WI). Sequencing libraries were then prepared from  
622 ribodepleted RNA using NEBNext® Ultra™ RNA Library Prep Kit for Illumina following the  
623 manufacturer's recommended protocol and barcoded using standard Illumina TruSeq barcoded  
624 adapter sequences. Final libraries were size-selected using Agencourt AMPure XP beads.  
625 Purified libraries were pooled and loaded onto either an Illumina NextSeq500 sequencer for 75  
626 base single end sequencing or an Illumina HiSeq2000 sequencer for 100 base single end  
627 sequencing with 7 base index read.

628 Genome Analyzer Pipeline Software (bcl2fastq ver.2.15.0.4) was used to perform image  
629 analysis, base calling, and demultiplexing. The program Cutadapt was used to trim the adapter  
630 and low base pair called scores. Per-exon gene counts were generated using TopHat2 software<sup>45</sup>  
631 and the HG19 release of the human genome. Raw count data analysis was performed using the  
632 Bioconductor software framework<sup>46</sup> and differential expression statistics were calculated using  
633 the DESeq2 package<sup>47</sup>. Genes differentially expressed in compound treated-samples vs. DMSO-  
634 treated samples were tabulated and results from both experiment sets were compared to each  
635 other using a cutoff of p-value levels less than 0.01.

636

637 **References**

638

- 639 1. Morrison, D. K. MAP Kinase Pathways. *Cold Spring Harb. Perspect. Biol.* **4**, a011254  
640 (2012).  
641
- 642 2. Nithianandarajah-Jones, G. N., Wilm, B., Goldring, C. E. P., Müller, J. & Cross, M. J.  
643 ERK5: Structure, regulation and function. *Cell. Signal.* **24**, 2187–2196 (2012).  
644
- 645 3. Mody, N., Campbell, D. G., Morrice, N., Pegg, M. & Cohen, P. An analysis of the  
646 phosphorylation and activation of extracellular-signal-regulated protein kinase 5 (ERK5)  
647 by mitogen-activated protein kinase kinase 5 (MKK5) in vitro. *Biochem. J.* **372**, 567–575  
648 (2003).  
649
- 650 4. Kondoh, K., Terasawa, K., Morimoto, H. & Nishida, E. Regulation of nuclear  
651 translocation of extracellular signal-regulated kinase 5 by active nuclear import and export  
652 mechanisms. *Mol. Cell. Biol.* **26**, 1679–1690 (2006).  
653
- 654 5. Morimoto, H., Kondoh, K., Nishimoto, S., Terasawa, K. & Nishida, E. Activation of a C-  
655 terminal transcriptional activation domain of ERK5 by autophosphorylation. *J. Biol.*  
656 *Chem.* **282**, 35449–35456 (2007).  
657
- 658 6. Diaz-Rodriguez, E. & Pandiella, A. Multisite phosphorylation of Erk5 in mitosis. *J. Cell*  
659 *Sci.* **123**, 3146–3156 (2010).  
660
- 661 7. Iñesta-Vaquera, F. a. *et al.* Alternative ERK5 regulation by phosphorylation during the  
662 cell cycle. *Cell. Signal.* **22**, 1829–1837 (2010).  
663
- 664 8. Honda, T. *et al.* Phosphorylation of ERK5 on Thr732 is associated with ERK5 nuclear  
665 localization and ERK5-dependent transcription. *PLoS One* **10**, e0117914 (2015).  
666
- 667 9. English, J. M. Identification of substrates and regulators of the mitogen-activated protein  
668 kinase ERK5 using chimeric protein kinases. *J. Biol. Chem.* **273**, 3854–3860 (1998).  
669
- 670 10. Kamakura, S., Moriguchi, T. & Nishida, E. Activation of the protein kinase ERK5/BMK1  
671 by receptor tyrosine kinases: identification and characterization of a signaling pathway to  
672 the nucleus. *J. Biol. Chem.* **274**, 26563–26571 (1999).  
673

- 674 11. Kato, Y. BMK1/ERK5 regulates serum-induced early gene expression through  
675 transcription factor MEF2C. *EMBO J.* **16**, 7054–7066 (1997).  
676
- 677 12. Kasler, H. G., Victoria, J., Duramad, O. & Winoto, A. ERK5 is a novel type of mitogen-  
678 activated protein kinase containing a transcriptional activation domain. *Mol. Cell. Biol.* **20**,  
679 8382–8389 (2000).  
680
- 681 13. Sohn, S. J., Li, D., Lee, L. K. & Winoto, A. Transcriptional regulation of tissue-specific  
682 genes by the ERK5 mitogen-activated protein kinase. *Mol. Cell. Biol.* **25**, 8553–8566  
683 (2005).  
684
- 685 14. Yan, L. *et al.* Knockout of ERK5 causes multiple defects in placental and embryonic  
686 development. *BMC Dev. Biol.* **3**, 11 (2003).  
687
- 688 15. Regan, C. P. *et al.* Erk5 null mice display multiple extraembryonic vascular and  
689 embryonic cardiovascular defects. *Proc. Natl. Acad. Sci.* **99**, 9248–9253 (2002).  
690
- 691 16. Hayashi, M. *et al.* Targeted deletion of BMK1/ERK5 in adult mice perturbs vascular  
692 integrity and leads to endothelial failure. *J. Clin. Invest.* **113**, 1138–1148 (2004).  
693
- 694 17. Koizumi, K. *et al.* Activation of p38 mitogen-activated protein kinase is necessary for  
695 gemcitabine-induced cytotoxicity in human pancreatic cancer cells. *Anticancer Res.* **25**,  
696 3347–3353 (2005).  
697
- 698 18. Pan, Y.-W. *et al.* Inducible and conditional deletion of extracellular signal-regulated  
699 kinase 5 disrupts adult hippocampal neurogenesis. *J. Biol. Chem.* **287**, 23306–23317  
700 (2012).  
701
- 702 19. Deng, X. *et al.* Discovery of a benzo[e]pyrimido-[5,4-b][1,4]diazepin-6(1H)-one as a  
703 potent and selective inhibitor of big MAP kinase 1. *ACS Med. Chem. Lett.* **2**, 195–200  
704 (2011).  
705
- 706 20. Yang, Q. *et al.* Pharmacological inhibition of BMK1 suppresses tumor growth through  
707 promyelocytic leukemia protein. *Cancer Cell* **18**, 258–267 (2010).  
708
- 709 21. Bera, A. *et al.* A positive feedback loop involving Erk5 and Akt turns on mesangial cell  
710 proliferation in response to PDGF. *AJP Cell Physiol.* **306**, C1089–C1100 (2014).  
711
- 712 22. Rovida, E. *et al.* The mitogen-activated protein kinase ERK5 regulates the development

- 713 and growth of hepatocellular carcinoma. *Gut* **64**, 1454–1465 (2015).  
714
- 715 23. Wilhelmsen, K., Mesa, K. R., Lucero, J., Xu, F. & Hellman, J. ERK5 protein promotes,  
716 whereas MEK1 protein differentially regulates, the toll-like receptor 2 protein-dependent  
717 activation of human endothelial cells and monocytes. *J. Biol. Chem.* **287**, 26478–26494  
718 (2012).  
719
- 720 24. Patricelli, M. P. *et al.* In situ kinase profiling reveals functionally relevant properties of  
721 native kinases. *Chem. Biol.* **18**, 699–710 (2011).  
722
- 723 25. Patricelli, M. P. *et al.* Functional interrogation of the kinome using nucleotide acyl  
724 phosphates. *Biochemistry* **46**, 350–358 (2007).  
725
- 726 26. Kato, Y. *et al.* Bmk1/Erk5 is required for cell proliferation induced by epidermal growth  
727 factor. *Nature* **395**, 713–6 (1998).  
728
- 729 27. Peebles, Jr., R. S., Bochner, B. S. & Schleimer, R. P. in *Inflammation: Mediators and*  
730 *Pathways* (eds. Ruffolo, Jr., R. R. & Hollinger, M. A.) (CRC Press, Inc., 1995).  
731
- 732 28. Martin, M. P., Olesen, S. H., Georg, G. I. & Schönbrunn, E. Cyclin-dependent kinase  
733 inhibitor dinaciclib interacts with the acetyl-lysine recognition site of bromodomains. *ACS*  
734 *Chem. Biol.* **8**, 2360–2365 (2013).  
735
- 736 29. Ember, S. W. J. *et al.* Acetyl-lysine binding site of bromodomain-containing protein 4  
737 (BRD4) interacts with diverse kinase inhibitors. *ACS Chem. Biol.* **9**, 1160–1171 (2014).  
738
- 739 30. Ciceri, P. *et al.* Dual kinase-bromodomain inhibitors for rationally designed  
740 polypharmacology. *Nat. Chem. Biol.* **10**, 305–312 (2014).  
741
- 742 31. Filippakopoulos, P. *et al.* Selective inhibition of BET bromodomains. *Nature* **468**, 1067–  
743 1073 (2010).  
744
- 745 32. Mirguet, O. *et al.* Discovery of epigenetic regulator I-BET762: lead optimization to afford  
746 a clinical candidate inhibitor of the BET bromodomains. *J. Med. Chem.* **56**, 7501–7515  
747 (2013).  
748
- 749 33. Nicodeme, E. *et al.* Suppression of inflammation by a synthetic histone mimic. *Nature*  
750 **468**, 1119–1123 (2010).  
751

- 752 34. Wu, L. *et al.* A novel IL-17 signaling pathway controlling keratinocyte proliferation and  
753 tumorigenesis via the TRAF4-ERK5 axis. *J. Exp. Med.* **212**, 1571–1587 (2015).  
754
- 755 35. Laan, M., Lötvall, J., Chung, K. F. & Lindén, A. IL-17-induced cytokine release in human  
756 bronchial epithelial cells in vitro: role of mitogen-activated protein (MAP) kinases. *Br. J.*  
757 *Pharmacol.* **133**, 200–206 (2001).  
758
- 759 36. Chesné, J. *et al.* IL-17 in severe asthma. Where do we stand? *Am. J. Respir. Crit. Care*  
760 *Med.* **190**, 1094–1101 (2014).  
761
- 762 37. Kawaguchi, M. *et al.* Modulation of bronchial epithelial cells by IL-17. *J. Allergy Clin.*  
763 *Immunol.* **108**, 804–809 (2001).  
764
- 765 38. Wilhelmsen, K. *et al.* Extracellular signal-regulated kinase 5 promotes acute cellular and  
766 systemic inflammation. *Sci. Signal.* **8**, ra86–ra86 (2015).  
767
- 768 39. Amit, I. *et al.* A module of negative feedback regulators defines growth factor signaling.  
769 *Nat. Genet.* **39**, 503–512 (2007).  
770
- 771 40. Finegan, K. G. *et al.* ERK5 is a critical mediator of inflammation-driven cancer. *Cancer*  
772 *Res.* **75**, 742–753 (2015).  
773
- 774 41. Weiss, W. A., Taylor, S. S. & Shokat, K. M. Recognizing and exploiting differences  
775 between RNAi and small-molecule inhibitors. *Nat. Chem. Biol.* **3**, 739–744 (2007).  
776
- 777 42. Belkina, A. C., Nikolajczyk, B. S. & Denis, G. V. BET protein function is required for  
778 inflammation: Brd2 genetic disruption and BET inhibitor JQ1 impair mouse macrophage  
779 inflammatory responses. *J. Immunol.* **190**, 3670–3678 (2013).  
780
- 781 43. Schaefer, U. Pharmacological inhibition of bromodomain-containing proteins in  
782 inflammation. *Cold Spring Harb. Perspect. Biol.* **6**, (2014).  
783
- 784 44. Klein, K. *et al.* The bromodomain protein inhibitor I-BET151 suppresses expression of  
785 inflammatory genes and matrix degrading enzymes in rheumatoid arthritis synovial  
786 fibroblasts. *Ann. Rheum. Dis.* 1–8 (2014). doi:10.1136/annrheumdis-2014-205809  
787
- 788 45. Kim, D. *et al.* TopHat2: accurate alignment of transcriptomes in the presence of  
789 insertions, deletions and gene fusions. *Genome Biol.* **14**, R36 (2013).  
790



- 791 46. Huber, W. *et al.* Orchestrating high-throughput genomic analysis with Bioconductor. *Nat.*  
792 *Methods* **12**, 115–121 (2015).  
793
- 794 47. Love, M. I., Huber, W. & Anders, S. Moderated estimation of fold change and dispersion  
795 for RNA-seq data with DESeq2. *Genome Biol.* **15**, 550 (2014).  
796

797 **Supplementary Information is linked to the online version of the paper at**

798 [www.nature.com/nature](http://www.nature.com/nature).

799

800 **Supplementary Results**

801 **Supplementary Data 1. KiNativ profile of compounds screened at 1  $\mu$ M in Jurkat cell**

802 **lysate.**

803 **Supplementary Data 2. KiNativ profile of compounds screened at 10  $\mu$ M in Jurkat cell**

804 **lysate.**

805 **Supplementary Table 1. Comparative efficacy of an ERK5-specific inhibitor and a BRD-**

806 **specific inhibitor in cell models of innate and adaptive immunity**

807 **Acknowledgements**

808 We express gratitude to our colleague and friend, the late Dr. Kevin Shreder for his invaluable  
809 contributions to this work. We thank Kai Nakamura, Lan Pham, Ray Li, and Julia Ayers for  
810 their assistance in chemical syntheses.

811

812 **Author Contributions**

813 E.C.K.L., C.M.A., and J.I. developed and performed cell-based assays; T.K.N. planned and  
814 analyzed KiNativ studies. H.W. analyzed the RNA-Seq results. K.S., Y.H., S.S., and B.L.  
815 designed and synthesized inhibitors. E.C.K.L, T.K.N., H.W., Y.H., J.W.K., and J.S.R. wrote the  
816 paper.

817

818 **Author Information**

819 Reprints and permissions information is available at [www.nature.com/reprints](http://www.nature.com/reprints).

820 Correspondence and requests for materials should be addressed to E.C.K.L.: [emmel@activx.com](mailto:emmel@activx.com)

821

822 **Competing Financial Interests**

823 E.C.K.L, C.M.A., T.K.N., H.W., Y.H., S.S., B.L., J.W.K., and J.S.R. , employees of ActivX  
824 Biosciences, a wholly owned subsidiary of Kyorin Pharmaceutical Co., Ltd. , and J.I., an  
825 employee of Kyorin Pharmaceutical Co., Ltd., have commercial interests in the development of  
826 ERK5 and BRD inhibitors.

827

828 **Table 1. Surface E-selectin expression on endothelial cells stimulated with TLR1/2 agonist**

829 **Pam<sub>3</sub>CSK<sub>4</sub>.**

| <b>Condition</b> | <b>E-selectin Expression<br/>(% of cell population)</b> | <b>Percent Inhibition</b> |
|------------------|---------------------------------------------------------|---------------------------|
| DMSO             | 17.2                                                    | 0                         |
| AX15836          | 18.5                                                    | 0                         |
| AX15839          | 13.7                                                    | 21                        |
| AX15892          | 18.1                                                    | 0                         |
| AX15910          | 12.8                                                    | 27                        |
| XMD8-92          | 10.9                                                    | 38                        |

830

831 HUVECs were pre-treated with 10  $\mu$ M of compound prior to stimulation with 10  $\mu$ g/mL

832 Pam<sub>3</sub>CSK<sub>4</sub> for 4 hrs. E-selectin expression was detected and quantified by flow cytometry.

833 Unstimulated cells expressed a baseline E-selectin expression of 0.6%. Shown are results from a

834 representative experiment from at least 2 independent experiments.

835

836 **Table 2. Inhibitor characteristics and classification.**

| <b>Compound</b> | <b>ERK5 IC<sub>50</sub></b><br><b>(nM)<sup>a</sup></b> | <b>BRD4(1) K<sub>d</sub></b><br><b>(nM)<sup>b</sup></b> | <b>Ratio of ERK5</b><br><b>IC<sub>50</sub>:BRD4(1)</b><br><b>K<sub>d</sub></b> | <b>Inhibitor</b><br><b>Classification</b> |
|-----------------|--------------------------------------------------------|---------------------------------------------------------|--------------------------------------------------------------------------------|-------------------------------------------|
| AX15836         | 8                                                      | 3600                                                    | 0.002                                                                          | ERK5                                      |
| AX15892         | 30                                                     | 610                                                     | 0.049                                                                          | ERK5                                      |
| AX15839         | 170                                                    | 130                                                     | 1.3                                                                            | Dual                                      |
| AX15910         | 20                                                     | 22                                                      | 0.9                                                                            | Dual                                      |
| XMD8-92         | 190                                                    | 170                                                     | 1.1                                                                            | Dual                                      |
| I-BET762        | >10000                                                 | 31                                                      | >320                                                                           | BRD                                       |
| JQ1             | >10000                                                 | 6                                                       | >1670                                                                          | BRD                                       |

837

838 <sup>a</sup>ERK5 IC<sub>50</sub> value determined using KiNativ

839 <sup>b</sup>BRD4(1) K<sub>d</sub> value determined at DiscoverX

840

841 **Table 3: EC<sub>50</sub> values of compounds in reducing cytokines IL-6 and IL-8 produced by**  
842 **endothelial cells stimulated with TLR1/2 agonist Pam<sub>3</sub>CSK<sub>4</sub>.**

| Compound | Inhibitor<br>Classification | EC <sub>50</sub> (μM) of cytokine reduction |      |
|----------|-----------------------------|---------------------------------------------|------|
|          |                             | IL-6                                        | IL-8 |
| AX15836  | ERK5                        | >>10                                        | >>10 |
| AX15839  | Dual                        | 1.73                                        | 1.79 |
| I-BET762 | BRD                         | 0.15                                        | 0.12 |

843

844 HUVECs were pre-treated with compound prior to stimulation with 10 μg/mL Pam<sub>3</sub>CSK<sub>4</sub> for 48  
845 hrs. Culture supernatants were tested for cytokines by immunoassay. Shown are results from a  
846 representative experiment from at least 2 independent experiments.

847

848 **Table 4: EC<sub>50</sub> values of compounds in reducing cytokines IL-6 and IL-8 produced by**  
849 **bronchial epithelial cells stimulated with IL-17A.**

| Compound | Inhibitor<br>Classification | EC <sub>50</sub> (μM) of cytokine reduction |      |
|----------|-----------------------------|---------------------------------------------|------|
|          |                             | IL-6                                        | IL-8 |
| AX15836  | ERK5                        | >>10                                        | >>10 |
| AX15839  | Dual                        | 1.13                                        | 1.07 |
| I-BET762 | BRD                         | 0.16                                        | 0.07 |

850

851 BEAS-2B cells were pre-treated with compound prior to stimulation with 50 ng/mL IL-17A for  
852 48 hrs. Culture supernatants were tested for cytokines by immunoassay. Shown are results from  
853 a representative experiment from at least 2 independent experiments.

854
